# Supplementary material
Source: ML conference proceedings conference paper supplement (https://openaccess.thecvf.com/content/CVPR2023/html/Son_SinGRAF_Learning_a_CVPR_2023_paper.html)
Supplement: Supplementary file 2 [file Son_SinGRAF_Learning_a_CVPR_2023_supplemental.zip]

Archive with 2 entries (2 files):
- singraf_video.mp4
- singraf_supp.pdf
